# Supplementary material
Source: Royal Society of Chemistry journal article supplement (doi:10.1039/d6an00186f)
Supplement: d6an00186f1.pdf [file d6an00186f1.pdf]

## Supplementary tables

**Supplementary Table S1. Complete overview of studies applying metabolomics and/or lipidomics to organoid-based models included in this review.** For each study, the organoid type, biological origin, omics strategy, analytical platform, and primary biological context are reported.

| <b>Author (Year)</b>           | <b>Journal</b>   | <b>Organoid type</b>     | <b>Species / origin</b>    | <b>Omics approach</b>             | <b>Analytical platform</b>              | <b>Biological context</b>                |
|--------------------------------|------------------|--------------------------|----------------------------|-----------------------------------|-----------------------------------------|------------------------------------------|
| <b>Bonanini et al. (2024)</b>  | Exp Cell Res     | Hepatic organoids        | Human, adult donor-derived | Targeted lipidomics               | HILIC-MS/MS (Exion LC AD + QTRAP 6500+) | Energy metabolism and glucose production |
| <b>Braun et al. (2020)</b>     | Cancers          | Pancreatic PDOs          | Human, patient-derived     | Untargeted metabolomics           | GC-MS                                   | Cancer recurrence mechanisms             |
| <b>Cappuccio et al. (2023)</b> | Front Mol Biosci | Brain organoids          | Human dorsal forebrain     | Spatial metabolomics & lipidomics | HR-MALDI-MSI + Orbitrap FTMS            | Human brain development                  |
| <b>Chen L. et al. (2022)</b>   | J Chromatogr B   | Colorectal PDOs          | Human, patient-derived     | Untargeted metabolomics           | UPLC-QTOF-MS                            | Metabolic response to curcumin           |
| <b>Chen J. et al. (2023)</b>   | Bioact Mater     | Biliary ductal organoids | Human-derived              | Untargeted metabolomics           | LC-MS (dansylation labeling)            | Biliary tree regeneration                |
| <b>Chen L. et al. (2025)</b>   | Biosci Rep       | Colon PDOs               | Human, patient-derived     | Metabolomics + transcriptomics    | HPLC-Orbitrap MS/MS                     | PHGDH inhibition, serine metabolism      |
| <b>Cheng et al. (2025)</b>     | Environ Res      | Hepatic organoids        | Human hESC-derived         | Metabolomics + transcriptomics    | UHPLC-OE-MS                             | Aged microplastic toxicity               |
| <b>Druso et al. (2025)</b>     | BMC Mol Cell     | Tracheospheres           | Mouse                      | Targeted metabolomics +           | UHPLC-Q Exactive                        | Differentiation media effects            |

|                                    |                    |                          |                        |                                |                                       |                                        |
|------------------------------------|--------------------|--------------------------|------------------------|--------------------------------|---------------------------------------|----------------------------------------|
|                                    | Biol               |                          |                        | transcriptomics                | MS                                    |                                        |
| <b>Duivenvoorden et al. (2023)</b> | Anal Chem          | Intestinal organoids     | Human small intestine  | Lipidomics + MSI               | MALDI-MSI + Orbitrap MS               | Spatial lipid phenotyping              |
| <b>Eckenstein et al. (2025)</b>    | Metabolites        | RCC tumoroids            | Human, patient-derived | Metabolomics + proteomics      | RPLC-Orbitrap Q Exactive HF           | Mitochondrial translation inhibition   |
| <b>Ene et al. (2025)</b>           | Stem Cell Res Ther | Blood vessel organoids   | Human iPSC-derived     | Targeted lipidomics            | UPLC-Triple Quad 6500 (MRM)           | Extracellular vesicle biomanufacturing |
| <b>Fan et al. (2025)</b>           | J Biol Chem        | Breast cancer PD-OTCs    | Human, patient-derived | SIRM (dual tracers)            | IC-UHR-FTMS + NMR                     | Metabolic reprogramming, therapy       |
| <b>Feng et al. (2025)</b>          | Food Res Int       | Hepatic polyspheres      | Human HepG2-derived    | Untargeted metabolomics        | LC-MS                                 | DBP-induced toxicity                   |
| <b>Gadara et al. (2024)</b>        | Anal Chem          | Cerebral organoids       | Human hiPSC-derived    | Targeted lipidomics            | Microbore LC-MS/MS (Triple Quad 6495) | APOE-related lipid phenotypes          |
| <b>Kes et al. (2025)</b>           | Cell Rep Med       | Kidney tumoroids         | Human, pediatric       | Metabolomics + isotope tracing | Q Exactive HF / Exactive MS           | Nucleotide synthesis vulnerability     |
| <b>Koc et al. (2025)</b>           | BMC Ophthalmol     | Corneal organoids        | Human hiPSC-derived    | Untargeted metabolomics        | GC-MS                                 | Aniridia-associated keratopathy        |
| <b>Krauß et al. (2025)</b>         | EMBO Mol Med       | AKP colorectal organoids | Mouse-derived          | Metabolomics + transcriptomics | UHPLC-Q Exactive Orbitrap             | EGFR-driven metabolic rewiring         |
| <b>La Gioia et al. (2025)</b>      | Anal Bioanal Chem  | Colorectal PDOs          | Human, patient-derived | Untargeted metabolomics        | Micro-UHPLC-Orbitrap Exploris 120     | Low-input sensitivity enhancement      |

|                                |                         |                            |                        |                                    |                            |                                 |
|--------------------------------|-------------------------|----------------------------|------------------------|------------------------------------|----------------------------|---------------------------------|
| <b>Li X. et al. (2025)</b>     | Toxicol Appl Pharmacol  | Lung organoids             | Mouse AT2-derived      | Untargeted metabolomics            | GC-MS                      | Anti-tuberculosis drug toxicity |
| <b>Li Y. et al. (2023)</b>     | Cell Rep Med            | PDAC PDOs                  | Human, patient-derived | Targeted metabolomics + lipidomics | LC-MS + GC-MS + UHPLC-QTOF | Chemotherapy resistance         |
| <b>Liu X. et al. (2022)</b>    | Sci Total Environ       | Brain organoids            | Human hiPSC-derived    | Lipidomics + transcriptomics       | UPLC-Orbitrap MS           | Graphene oxide toxicity         |
| <b>Liu Q. et al. (2024)</b>    | Adv Sci                 | Cochlear organoids         | Mouse-derived          | Metabolomics + transcriptomics     | LC-MS/MS (Triple TOF 5600) | Hair cell differentiation       |
| <b>Neef et al. (2020)</b>      | Metabolites             | Colorectal PDOs            | Human, patient-derived | Metabolomics + lipidomics          | LC-QTOF-MS (HILIC + RPLC)  | 5-FU metabolic response         |
| <b>Notaras et al. (2021)</b>   | Mol Psychiatry          | Forebrain organoids        | Human-derived          | Metabolomics + proteomics          | Hybrid MS                  | Neuropsychiatric risk           |
| <b>Ochima et al. (2025)</b>    | Front Bioeng Biotechnol | Kidney-related 3D cultures | Human HEK293T          | Untargeted metabolomics            | 400 MHz <sup>1</sup> H-NMR | Cell adhesion mechanisms        |
| <b>Rodrigues et al. (2021)</b> | Arch Toxicol            | Intestinal organoids       | Human colon & SI       | Metabolomics + transcriptomics     | FI-MS (Q Exactive)         | 5-FU intestinal toxicity        |
| <b>Romeo et al. (2023)</b>     | Nat Commun              | Blood vessel organoids     | Human iPSC-derived     | Metabolomics + proteomics          | LC-MS/MS Q-TOF             | Microvascular integrity         |
| <b>Sekhar et al. (2023)</b>    | Front Endocrinol        | Parathyroid PDOs           | Human, benign          | Untargeted metabolomics            | UHPLC-MS/MS Q Exactive HF  | Hyperparathyroidism             |
| <b>Taylor et al. (2020)</b>    | Sci Rep                 | Adipose organoids          | Mouse-derived          | Shotgun lipidomics                 | Q Exactive Plus            | Immune-adipocyte crosstalk      |

|                                   |                        |                      |                                 |                                |                           |                                   |
|-----------------------------------|------------------------|----------------------|---------------------------------|--------------------------------|---------------------------|-----------------------------------|
| <b>Toyoda et al. (2024)</b>       | Cancer Sci             | Pancreatic organoids | Mouse-derived                   | Metabolomics + proteomics      | SWATH-MS + CE-TOFMS       | TP53-related vulnerabilities      |
| <b>van der Kemp et al. (2023)</b> | NMR Biomed             | CRC tumoroids        | Human-derived                   | Targeted metabolomics          | HR-MAS MRS + solution NMR | Tumor progression                 |
| <b>Wang G. et al. (2022)</b>      | Cell Stem Cell         | Kidney organoids     | Human fetal / hiPSC             | Metabolomics + transcriptomics | MALDI-MSI + NMR           | Metabolic fate trajectories       |
| <b>Wang Q. et al. (2021)</b>      | Front Genet            | Kidney organoids     | Human hiPSC-derived             | Metabolomics + transcriptomics | UHPLC-Orbitrap MS         | Differentiation dynamics          |
| <b>Wang X. et al. (2024)</b>      | Food Res Int           | Intestinal organoids | Human-derived                   | Metabolomics + transcriptomics | Triple TOF 6600           | Breast milk vs formula            |
| <b>Wang X. et al. (2025)</b>      | Mol Nutr Food Res      | Intestinal organoids | Human-derived                   | Multistage metabolomics        | Triple TOF 6600           | Nutritional effects               |
| <b>Wang X. et al. (2024)</b>      | Nutrients              | Intestinal organoids | Human-derived                   | Multi-omics                    | LC-QTOF-MS                | ECM and junctional biology        |
| <b>Xuan et al. (2024)</b>         | Sci Total Environ      | Intestinal organoids | Mouse-derived                   | Untargeted metabolomics        | LC-MS/MS                  | Nanoplastic safety                |
| <b>Xuan et al. (2025)</b>         | Ecotoxicol Environ Saf | Lung organoids       | Mouse-derived                   | Metabolomics + transcriptomics | LC-MS                     | Radiation toxicity                |
| <b>Zhou et al. (2025)</b>         | Acta Pharmacol Sin     | CRC PDOs             | Human paired primary/metastatic | Targeted metabolomics          | GC-TOFMS + UPLC-MS/MS     | Histone lactylation in metastasis |

**Supplementary Table S2. Detailed technical characteristics of analytical platforms used in organoid-based metabolomics and lipidomics studies.**

| <b>Platform category</b>     | <b>MS analyzer</b>    | <b>Chromatography / acquisition</b> | <b>Quantification</b>             | <b>Typical metabolome coverage</b> | <b>Representative studies</b>      |
|------------------------------|-----------------------|-------------------------------------|-----------------------------------|------------------------------------|------------------------------------|
| <b>Untargeted LC-MS</b>      | Orbitrap, Q-TOF       | UHPLC (RPLC/HILIC), ESI $\pm$       | Relative (TIC, peak sum, z-score) | $10^2$ – $10^3$ features           | Braun 2020; Chen 2022; Wang X 2025 |
| <b>Targeted LC-MS</b>        | Triple quad, Orbitrap | UHPLC-MS/MS (MRM/PRM)               | Absolute / semi-absolute          | $10^1$ – $10^2$ metabolites        | Krauß 2025; Druso 2025             |
| <b>Lipidomics (LC/MS)</b>    | Orbitrap, triple quad | HILIC-MS/MS, shotgun                | Relative / absolute               | $10^2$ – $10^3$ lipids             | Bonanini 2024; Gadara 2024         |
| <b>Microbore LC-MS</b>       | Triple quad, Orbitrap | 1.0 mm i.d. UHPLC                   | Relative                          | $10^2$ – $10^3$ features           | Gadara 2024; La Gioia 2025         |
| <b>GC-MS</b>                 | Single quad, TOF      | EI-GC-MS + derivatization           | Relative                          | $10^1$ – $10^2$ metabolites        | Braun 2020; Koc 2025               |
| <b>MSI</b>                   | TOF, Orbitrap, FTICR  | MALDI-MSI                           | Relative (pixel-based)            | $10^2$ m/z features                | Cappuccio 2023; Wang G 2022        |
| <b>NMR</b>                   | 400–800 MHz           | HR-MAS / solution $^1\text{H}$ -NMR | Relative (AUC)                    | $\sim 10$ – $50$ metabolites       | van der Kemp 2023                  |
| <b>Multi-platform / SIRM</b> | Orbitrap, Q-TOF, NMR  | LC-MS + GC-MS $\pm$ tracers         | Absolute / enrichment             | Pathway-resolved                   | Fan 2025; Kes 2025                 |
